# Supplementary material for: Synthesis of hierarchical hexagonal zinc oxide/zinc aluminium hydroxide heterostructures through epitaxial growth using microwave irradiation
Source: Royal Society of Chemistry journal article supplement (doi:10.1039/b902130b), 2009-01-01
Supplement: b902130b.pdf [file b902130b.pdf]

## Supporting Information

### Synthesis of Hierarchical Hexagonal Zinc Oxide/Zinc Aluminum Hydroxide Heterostructures through Epitaxial Growth Using Microwave Irradiation

Seungho Cho, Semi Kim, Eugene Oh, Seung-Ho Jung and Kun-Hong Lee

Department of Chemical Engineering and Department of Mechanical Engineering, Pohang University of Science and Technology (POSTECH), San 31, Hyoja-Dong, Nam-Gu, Pohang, Gyungbuk, Korea, 790-784

E-mail: ce20047@postech.ac.kr

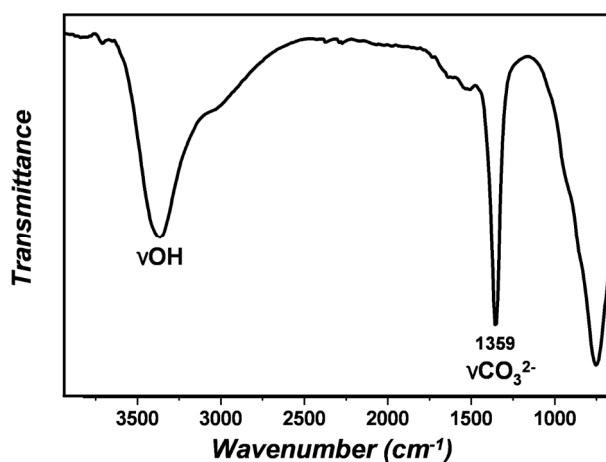

**Figure S1.** FT-IR absorption spectrum of ZnAl:LDHs synthesized by microwave irradiation.

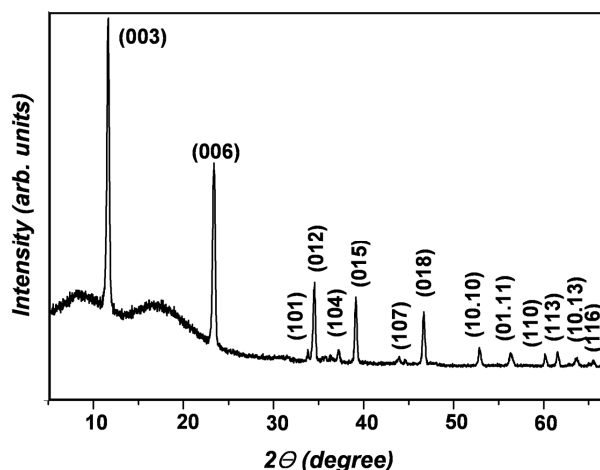

**Figure S2.** XRD pattern of ZnAl:LDHs synthesized by microwave irradiation.

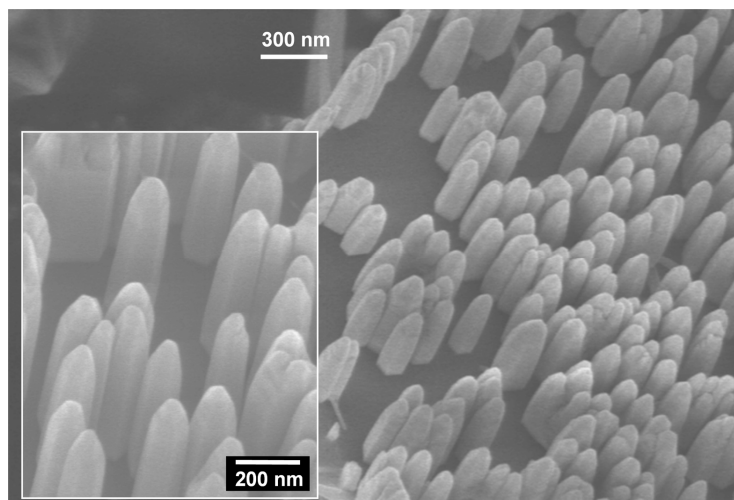

**Figure S3.** SEM image of a ZnO nanorod/ZnAl:LDHs heterostructure synthesized by microwave irradiation.

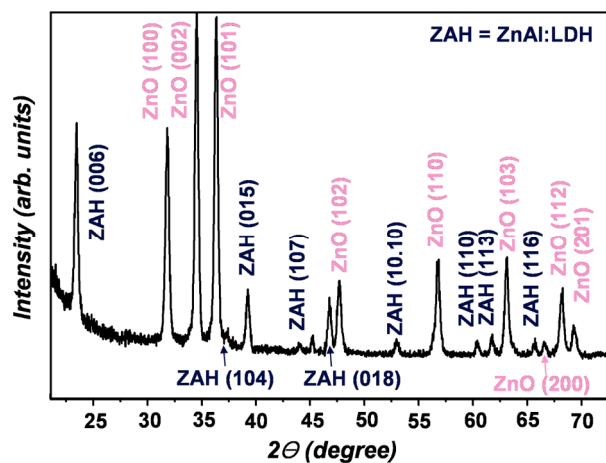

**Figure S4.** XRD pattern of ZnO nanorod/ZnAl:LDHs heterostructures synthesized by microwave irradiation.
